# Supplementary material
Source: PubMed Central journal article supplement (PMC5599715)
Supplement: MCB.00225-17_zmb019171608s1.pdf [file MCB.00225-17_zmb019171608s1.pdf]

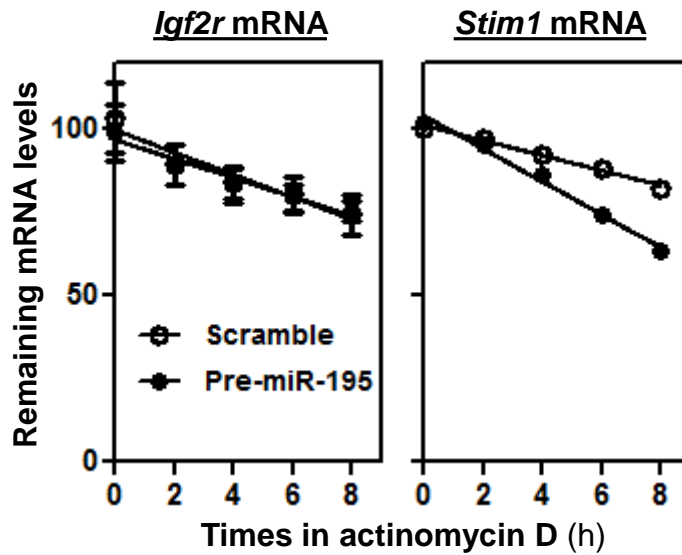

**Supplemental FIG. 1.** Half-life of *Igf2r* mRNA in cells overexpressing miR-195. Forty-eight hours after transfecting cells with pre-miR-195, actinomycin D was added at the concentration of 5  $\mu\text{g}/\text{ml}$ . Total cellular RNA was isolated at indicated times thereafter, and the remaining levels of *Igf2r* and *Stim1* mRNAs were measured by Q-PCR analysis. Values are the means  $\pm$  SEM from triplicate samples.

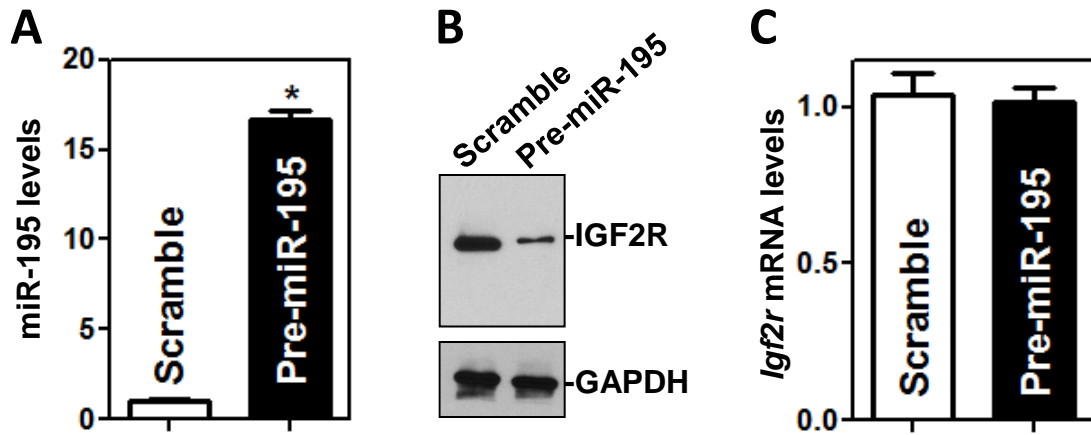

**Supplemental FIG. 2.** Ectopic miR-195 overexpression inhibits IGF2R expression in Caco-2 cells. **(A)** Levels of miR-195 48 h after transfecting cells with pre-miR-195 as measured by Q-PCR analysis. Values are the means  $\pm$  SEM from triplicate samples.  $P < 0.05$  compared with scramble. **(B,C)** Representative immunoblots of IGF2R and its mRNA levels in cells described in **A**.

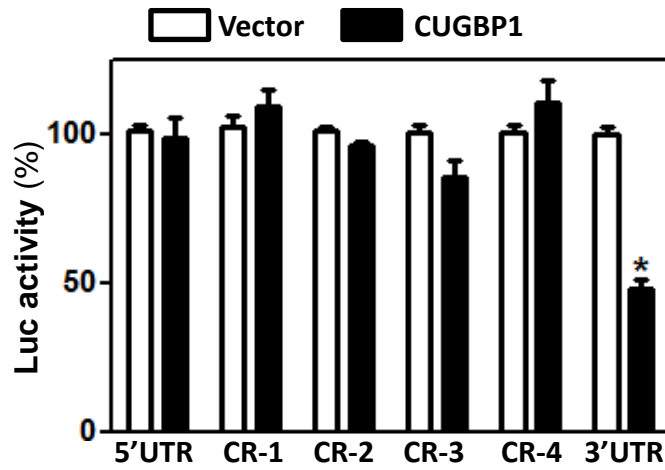

**Supplementary FIG 3.** Levels of reporter activities as measured by analysis of *Igf2r* 5'UTR, CR, or 3'UTR luciferase (Luc) reporters after ectopic overexpression of CUGBP1 for 48 h. Values are the means  $\pm$  SEM from triplicate samples. \*  $P < 0.05$  compared with cells transfected with control vector.

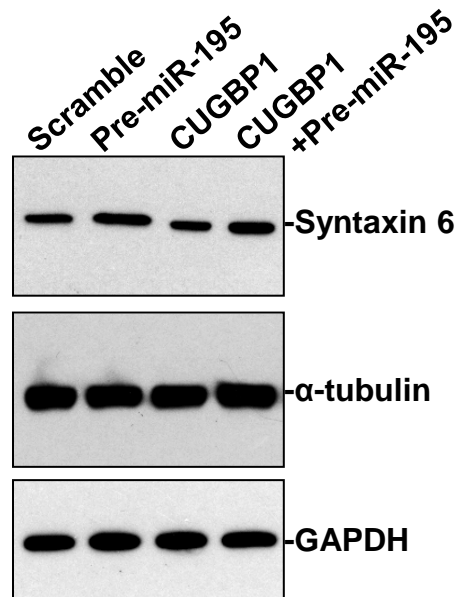

**Supplemental FIG. 4.** Levels of syntaxin 6 and  $\alpha$ -tubulin in cells overexpressing miR-195, CUGBP1, or both. Forty-eight hours after transfecting cells with pre-miR-195, CUGBP1 expression vector, or both, whole-cell lysates were harvested, and the levels of syntaxin 6 and  $\alpha$ -tubulin proteins were examined by immunoblotting analysis.

## Supplemental Table: Primers for IGF2R luciferase reporters

| Name   | Sequence                       |
|--------|--------------------------------|
| 5UTR-F | GTTTAAACGCTCCCGTTGCAGCTTCGA    |
| 5UTR-R | GCTCTAGACGCGTGTGGCGTGGG        |
| 3UTR-F | GTTT AAACACGAGGACCTCCTACACATCT |
| 3UTR-R | GCTCTAGATAGTTAATAATTTATTTTTA   |
| CR1-F  | GTTT AAACGATGCGGGCCGTTCT       |
| CR1-R  | GCTCTAGACAGCTGTGTGCCACTCAAAC   |
| CR2-F  | GTTT AAAGTGGCGATGACTGTGGTAATGA |
| CR2-R  | GCTCTAGAGATTAAGGAGCCCTGCCACT   |
| CR3-F  | GTTT AAAGTGTGGGTCCAAGGCAGTCT   |
| CR3-R  | GCTCTAGATCGCAGTTTTGCTACACCAC   |
| CR4-F  | GTTT AAAGTTGCCCTCCAGAAACGGAA   |
| CR4-R  | GCTCTAGACCTTCTCCTGTAGGCACCA    |

| Name                 | Sequence                            |
|----------------------|-------------------------------------|
| 3'UTR-F1-F           | CGTTTAAACATCTGACTCCGTGGTGCCTA       |
| 3'UTR-F1-R           | CTCTAGACTTCACCTTATGCCCTTGCT         |
| 3'UTR-F2-F           | CGTTTAAACCAGGTTTGCGAAAAAGGAAA       |
| 3'UTR-F2-R           | CTCTAGATCACCTGTGCAAATTAAGG          |
| 3'UTR-F3-F           | CGTTTAAACAGTAGAGGCTCTTGGAGAGGAG     |
| 3'UTR-F3R            | CTCTAGACACTCAATGTGAAATCAAATAAGC     |
| 3'UTR-F1-Deletion    | CAACAGAGGGCTGTGTTTTAGACCCTATAGGGTGA |
| 3'UTR-F1-Deletion-AS | TCACCCTATAGGGTCTAAAACACAGCCCTCTGTTG |
